# Supplementary material for: Challenges in Saving Trauma Patients in Seoul Based on the 2016–2020 Community-Based Severe Trauma Survey
Source: MDPI journal article supplement (doi:10.3390/jcm14051471), 2025-02-22
Supplement: s1 [file jcm-3472287-supplementary.pdf › jcm-3472287-supplementary.pdf]

**Table S1. Definitions of preventability for death panel review [3].**

| Preventability                                                         | Definitions                                                                                                                                                                                                                                                                                                                                                                                                                                                         |
|------------------------------------------------------------------------|---------------------------------------------------------------------------------------------------------------------------------------------------------------------------------------------------------------------------------------------------------------------------------------------------------------------------------------------------------------------------------------------------------------------------------------------------------------------|
| <b>A. Preventable</b>                                                  | <ul style="list-style-type: none"> <li>• Injuries and sequelae considered survivable</li> <li>• Death could have been prevented if appropriate steps had been taken</li> <li>• Frank deviations from standard of care that, directly or indirectly, caused patient's death</li> <li>• Statistically, probability of survival greater than 50%, or ISS below 20</li> </ul>                                                                                           |
| <b>B. Potentially preventable</b>                                      | <ul style="list-style-type: none"> <li>• Injuries and sequelae severe but survivable</li> <li>• Death potentially could have been prevented if appropriate steps had been taken</li> <li>• Evaluation and management generally appropriate</li> <li>• Some deviations from standard of care that may, directly or indirectly, have been implicated in patient's death</li> <li>• Statistically, probability of survival 25%–50% or ISS between 20 and 50</li> </ul> |
| <b>C. Non-preventable</b>                                              | <ul style="list-style-type: none"> <li>• Injuries and sequelae non-survivable even with optimal management</li> <li>• Evaluation and management appropriate according to accepted standards</li> <li>• If patient had co-morbid factors, these were major contributors to death</li> <li>• Statistically, probability of survival less than 25% or ISS above 50</li> </ul>                                                                                          |
| <b>D. Non-preventable, but with care that could have been improved</b> | <ul style="list-style-type: none"> <li>• As with non-preventable above, but care is questionable or clear errors in care are detected, even though these did not lead to the death</li> </ul>                                                                                                                                                                                                                                                                       |

ISS, Injury Severity Score
